# Supplementary material for: Validation of the Khorana score for predicting venous thromboembolism in 40 218 patients with cancer initiating chemotherapy
Source: PubMed Central journal article supplement — Blood Adv. 2022 May 13;6(10):2967–76. doi: 10.1182/bloodadvances.2021006484 (PMC9131922; doi:10.1182/bloodadvances.2021006484), 2022-05-13
Supplement: advancesADV2021006484-suppl1.pdf [file advancesADV2021006484-suppl1.pdf]

Supplementary material

**Validation of the Khorana score for predicting venous thromboembolism in 40,218 cancer patients initiating chemotherapy**

| <b>Supplementary Table S1</b> The Khorana score and its components |                                                                      |              |
|--------------------------------------------------------------------|----------------------------------------------------------------------|--------------|
|                                                                    | <b>Khorana component</b>                                             | <b>Score</b> |
| <b>Cancer type</b>                                                 | Stomach                                                              | +2           |
|                                                                    | Pancreatic                                                           | +2           |
|                                                                    | Lung                                                                 | +1           |
|                                                                    | Lymphoma                                                             | +1           |
|                                                                    | Gynecological                                                        | +1           |
|                                                                    | Bladder                                                              | +1           |
|                                                                    | Testicular                                                           | +1           |
|                                                                    | Other                                                                | 0            |
| <b>Laboratory values</b>                                           | Hemoglobin level <10 g/dL or use of erythropoiesis stimulating agent | +1           |
|                                                                    | Pre-chemotherapy platelet count $\geq 350 \times 10^9/L$             | +1           |
|                                                                    | Pre-chemotherapy leukocyte count $> 11 \times 10^9/L$                | +1           |
| <b>Anthropometry</b>                                               | Body mass index $\geq 35 \text{ kg/m}^2$                             | +1           |
| <b>Maximum score</b>                                               |                                                                      | 6            |

| <b>Supplementary Table S2</b> Codes used to define the study population, covariates, and outcomes                                             |                                                                          |                                                                                                                           |                |
|-----------------------------------------------------------------------------------------------------------------------------------------------|--------------------------------------------------------------------------|---------------------------------------------------------------------------------------------------------------------------|----------------|
|                                                                                                                                               | <b>Code type and source</b>                                              | <b>Codes</b>                                                                                                              |                |
| Chemotherapy                                                                                                                                  | ICD-10 codes, treatment, and procedure codes – National Patient Registry | BWHA1-3                                                                                                                   |                |
| Atrial fibrillation                                                                                                                           |                                                                          | I48                                                                                                                       |                |
| Mechanical heart valves                                                                                                                       |                                                                          | KFCA60 KFGE00 KFKD00 KFJF00 KFMD00 KFDK51 KFMD54                                                                          |                |
| <b><i>Khorana components</i></b>                                                                                                              |                                                                          |                                                                                                                           |                |
| Stomach                                                                                                                                       |                                                                          | C16                                                                                                                       |                |
| Lung                                                                                                                                          |                                                                          | C34                                                                                                                       |                |
| Pancreatic                                                                                                                                    |                                                                          | C25                                                                                                                       |                |
| Lymphoma                                                                                                                                      |                                                                          | C81-86                                                                                                                    |                |
| Gynecologic                                                                                                                                   |                                                                          | C51-58                                                                                                                    |                |
| Bladder                                                                                                                                       |                                                                          | C679                                                                                                                      |                |
| Testicular                                                                                                                                    |                                                                          | C62                                                                                                                       |                |
| Body mass index $\geq 35$ kg/m <sup>2</sup>                                                                                                   |                                                                          | DE660C-DE660H DE662                                                                                                       |                |
| Hemoglobin                                                                                                                                    |                                                                          | Treatment code – National Patient Registry & NPU codes - Register of Laboratory Results for Research database             | NPU02319 BOHE1 |
| Platelet count                                                                                                                                | NPU03568                                                                 |                                                                                                                           |                |
| Leukocyte count                                                                                                                               | NPU02593                                                                 |                                                                                                                           |                |
| <b><i>Cancer types used in stratified analyses</i></b>                                                                                        |                                                                          |                                                                                                                           |                |
| Gastrointestinal                                                                                                                              | ICD-10 codes – National Patient Registry                                 | C15-21, C26                                                                                                               |                |
| Hepatobiliary or pancreatic                                                                                                                   |                                                                          | C22-25                                                                                                                    |                |
| Lung                                                                                                                                          |                                                                          | C34                                                                                                                       |                |
| Breast                                                                                                                                        |                                                                          | C50                                                                                                                       |                |
| Renal, bladder or prostate                                                                                                                    |                                                                          | C61, C64-68                                                                                                               |                |
| Gynecologic                                                                                                                                   |                                                                          | C51-58                                                                                                                    |                |
| Hematologic                                                                                                                                   |                                                                          | C81-88, C91-95                                                                                                            |                |
| <b><i>Medication</i></b>                                                                                                                      |                                                                          |                                                                                                                           |                |
| Anticoagulation                                                                                                                               | ATC codes – National Prescription Registry                               | B01AA03 B01AF02 B01AA04 B01AE07 B01AF01 B01AF03 B01AB                                                                     |                |
| <b><i>Outcomes</i></b>                                                                                                                        |                                                                          |                                                                                                                           |                |
| Venous thromboembolism (primary outcome)                                                                                                      | ICD-10 codes and procedure codes – National Patient Registry             | I26 I801 I802 I803 I808 I809 and imaging code UXUG or UXC                                                                 |                |
| Venous thromboembolism (broad definition)                                                                                                     | ICD-10 codes – National Patient Registry                                 | H348E H348F I26 I636 I676 I801 I802 I803 I808 I809 I81 I822 I823 I828 I829 O223 O225 O229 O871 O879 O873 O882 T817C T817D |                |
| NPU: Nomenclature, Properties and Units<br>ICD: International Classification of Diseases<br>ATC: Anatomical Therapeutic Classification system |                                                                          |                                                                                                                           |                |

**Supplementary Table S3** Number of events and six-month cumulative incidence of venous thromboembolism stratified by cancer type and original Khorana score categories using two different risk estimators with and without competing risk

|                                           |                        | No. of events | Cumulative incidence, % (95% confidence interval) |                | Relative overestimation by Kaplan Meier |
|-------------------------------------------|------------------------|---------------|---------------------------------------------------|----------------|-----------------------------------------|
|                                           |                        |               | Competing risk estimate*                          | Kaplan Meier   |                                         |
| Cancer type                               |                        |               |                                                   |                |                                         |
| <i>Gastrointestinal cancer</i>            | 0: Low risk            | 89            | 2.2 (1.8-2.7)                                     | 2.3 (1.8-2.8)  | 4.5%                                    |
|                                           | 1-2: Intermediate risk | 125           | 3.0 (2.5-3.6)                                     | 3.2 (2.7-3.8)  | 6.7%                                    |
|                                           | ≥3: High risk          | 44            | 5.7 (4.2-7.5)                                     | 6.3 (4.7-8.4)  | 10.5%                                   |
| <i>Hepatobiliary or pancreatic cancer</i> | 0: Low risk            | 15            | 4.4 (2.6-6.9)                                     | 4.7 (2.8-7.6)  | 6.8%                                    |
|                                           | 1-2: Intermediate risk | 62            | 5.6 (4.3-7.1)                                     | 6.1 (4.8-7.8)  | 8.9%                                    |
|                                           | ≥3: High risk          | 34            | 4.0 (2.9-5.5)                                     | 4.7 (3.4-6.6)  | 17.5%                                   |
| <i>Lung cancer</i>                        | 1-2: Intermediate risk | 91            | 3.2 (2.7-3.7)                                     | 3.4 (3.0-4.0)  | 6.3%                                    |
|                                           | ≥3: High risk          | 118           | 3.3 (2.4-4.3)                                     | 3.9 (3.0-5.2)  | 18.1%                                   |
| <i>Breast cancer</i>                      | 0: Low risk            | 38            | 0.7 (0.5-0.9)                                     | 0.7 (0.5-0.9)  | 0%                                      |
|                                           | 1-2: Intermediate risk | 10            | 0.6 (0.3-1.0)                                     | 0.6 (0.3-1.0)  | 0%                                      |
|                                           | ≥3: High risk          | <5            | N/A†                                              |                |                                         |
| <i>Urologic cancer, incl. prostate</i>    | 0: Low risk            | 25            | 2.0 (1.3-2.9)                                     | 2.0 (1.4-3.0)  | 0%                                      |
|                                           | 1-2: Intermediate risk | 49            | 4.5 (3.4-5.9)                                     | 4.7 (3.6-6.2)  | 4.4%                                    |
|                                           | ≥3: High risk          | 10            | 6.1 (3.1-10.5)                                    | 7.5 (4.0-13.6) | 23.0%                                   |
| <i>Gynecologic cancer</i>                 | 1-2: Intermediate risk | 52            | 2.4 (1.8-3.1)                                     | 2.4 (1.8-3.2)  | 0%                                      |
|                                           | ≥3: High risk          | 27            | 5.0 (3.4-7.1)                                     | 5.3 (3.7-7.7)  | 6.0%                                    |
| <i>Hematologic cancer</i>                 | 0: Low risk            | <5            | 0.5 (0.1-1.8)                                     | 0.5 (0.1-2.2)  | 0%                                      |
|                                           | 1-2: Intermediate risk | 96            | 2.4 (2.0-3.0)                                     | 2.6 (2.1-3.1)  | 8.3%                                    |
|                                           | ≥3: High risk          | 13            | 2.6 (1.4-4.2)                                     | 2.7 (1.6-4.7)  | 3.8%                                    |

Note: For lung and gynecological cancer, all patients are assigned minimum 1 point due to cancer type.

\* Considering death as competing risk † Too few events to estimate cumulative incidence.

| <b>Supplementary Table S4</b> Number of events and six-month cumulative incidence of venous thromboembolism in cancer patients initiating chemotherapy using a broad outcome definition*                                   |                    |                  |                                                       |
|----------------------------------------------------------------------------------------------------------------------------------------------------------------------------------------------------------------------------|--------------------|------------------|-------------------------------------------------------|
|                                                                                                                                                                                                                            | Patients, <i>n</i> | Events, <i>n</i> | Cumulative incidence, %<br>(95% confidence interval†) |
| Overall                                                                                                                                                                                                                    | 40,221             | 1,376            | 3.4 (3.2-3.6)                                         |
| <i>Original Khorana categories</i>                                                                                                                                                                                         |                    |                  |                                                       |
| 0: Low risk                                                                                                                                                                                                                | 14,258             | 335              | 2.4 (2.1-2.6)                                         |
| 1-2: Intermediate risk                                                                                                                                                                                                     | 21,561             | 822              | 3.8 (3.6-4.1)                                         |
| ≥3: High risk                                                                                                                                                                                                              | 4,402              | 219              | 5.0 (4.4-5.6)                                         |
| <i>Khorana score level</i>                                                                                                                                                                                                 |                    |                  |                                                       |
| 1                                                                                                                                                                                                                          | 12,860             | 435              | 3.4 (3.1-3.7)                                         |
| 2                                                                                                                                                                                                                          | 8,701              | 387              | 4.4 (4.0-4.9)                                         |
| 3                                                                                                                                                                                                                          | 3,623              | 175              | 4.8 (4.2-5.6)                                         |
| 4                                                                                                                                                                                                                          | 716                | 39               | 5.4 (3.9-7.3)                                         |
| 5-6                                                                                                                                                                                                                        | 63                 | 5                | 7.9 (2.9-16.2)                                        |
| <i>Guideline threshold</i>                                                                                                                                                                                                 |                    |                  |                                                       |
| Score 0-1                                                                                                                                                                                                                  | 27,118             | 770              | 2.8 (2.6-3.0)                                         |
| Score ≥2                                                                                                                                                                                                                   | 13,103             | 606              | 4.6 (4.3-5.0)                                         |
| *Includes pulmonary embolism, deep vein thrombosis, thrombophlebitis and thrombosis located in the retinal, cerebral, portal, caval, or renal vein without requiring imaging procedures in combination with the diagnoses. |                    |                  |                                                       |
| † Based on the cumulative incidence function considering death as competing risk.                                                                                                                                          |                    |                  |                                                       |
